# Supplementary material for: Efficacy and Safety of Auricular Acupuncture for Depression: A Randomized Clinical Trial
Source: PubMed Central journal article supplement (PMC10690462; doi:10.1001/jamanetworkopen.2023.45138), 2023-11-30
Supplement: jamanetwopen-e2345138-s002.pdf [file jamanetwopen-e2345138-s002.pdf]

## Supplemental Online Content

de Oliveira Rodrigues DM, Menezes PR, Machado Ribeiro Silotto A, et al. Efficacy and safety of auricular acupuncture for depression: a randomized clinical trial. *JAMA Netw Open*. 2023;6(11):e2345138. doi:10.1001/jamanetworkopen.2023.45138

**eTable 1.** Study Inclusion and Exclusion Criteria

**eFigure 1.** Data Collection Procedures

**eFigure 2.** Points Applied In The Auricular Pavilion of the Specific Auricular Acupuncture (SA) Group

**eTable 2.** Universal Nomenclature, Location, and Indications of the Points Used in the Groups

**eFigure 3.** Points Applied in the Auricular Pavilion of the Nonspecific Auricular Acupuncture (NSA) Group

**eTable 3.** Primary and Secondary Outcomes of the Study

**eTable 4.** Loss to Follow-Up Throughout the Study

**eTable 5.** Baseline Depression Score Analysis for Participants Who Did Not Complete the Study

**eTable 6.** Secondary Outcomes of Depression Scores by Intention-to-Treat Analysis

**eTable 7.** Secondary Efficacy Outcomes in Depression Recovery and Remission by Modified Intent-to-Treat Analysis

**eTable 8.** Secondary Outcomes of Depression Scores by Modified Intent-to-Treat Analysis

**eFigure 4.** Median Depression Scores by Modified Intent-to-Treat Analysis

**eTable 9.** Sensitivity Analysis for Depression Recovery With Missing Data Imputation

**eTable 10.** Sensitivity Analysis for Symptom Remission With Missing Data Imputation

**eTable 11.** Sensitivity Analysis for Depression Score with Missing Data Imputation

**eTable 12.** Adjustment of the Generalized Estimating Equations (GEE) Model

**eTable 13.** Blinding Assessment and Perception of Treatment Efficacy

This supplemental material has been provided by the authors to give readers additional information about their work.

**eTable 1. Study Inclusion and Exclusion Criteria**

|                           |                                                                                                                                                                                                                                                                                                                                                                                                                                                                                                                                                                                                                                                                                                                                                                              |
|---------------------------|------------------------------------------------------------------------------------------------------------------------------------------------------------------------------------------------------------------------------------------------------------------------------------------------------------------------------------------------------------------------------------------------------------------------------------------------------------------------------------------------------------------------------------------------------------------------------------------------------------------------------------------------------------------------------------------------------------------------------------------------------------------------------|
| <b>ELIGIBILITY</b>        | The study's eligibility was assessed in a pre-screening conducted in a dedicated room, ensuring participant integrity, confidentiality, and anonymity. The following inclusion and exclusion criteria were employed for the study.                                                                                                                                                                                                                                                                                                                                                                                                                                                                                                                                           |
| <b>INCLUSION CRITERIA</b> | <ul style="list-style-type: none"><li>• Age between 18 and 50 years;</li><li>• Attainment of minimum PHQ-9 scores for moderate/moderately severe depression;</li><li>• Availability during the session timings.</li></ul>                                                                                                                                                                                                                                                                                                                                                                                                                                                                                                                                                    |
| <b>EXCLUSION CRITERIA</b> | <ul style="list-style-type: none"><li>• Use of complementary therapies for a minimum of 3 months;</li><li>• Risk of suicidal ideation assessed through question 9 of the PHQ-9;</li><li>• Severe depression assessed via PHQ-9 scores;</li><li>• Prior application of auricular acupuncture;</li><li>• Pregnancy;</li><li>• Menopause;</li><li>• Allergy to metals and micropores;</li><li>• Healthcare students with a history of complementary therapies in the curriculum;</li><li>• Individuals with scheduled vacations during the data collection period;</li><li>• Lack of accessible earlobe areas due to mutilation, cartilage deformation, earring piercings, or other artifacts hindering the application of auricular technique at the specific point.</li></ul> |

**eFigure 1. Data Collection Procedures**

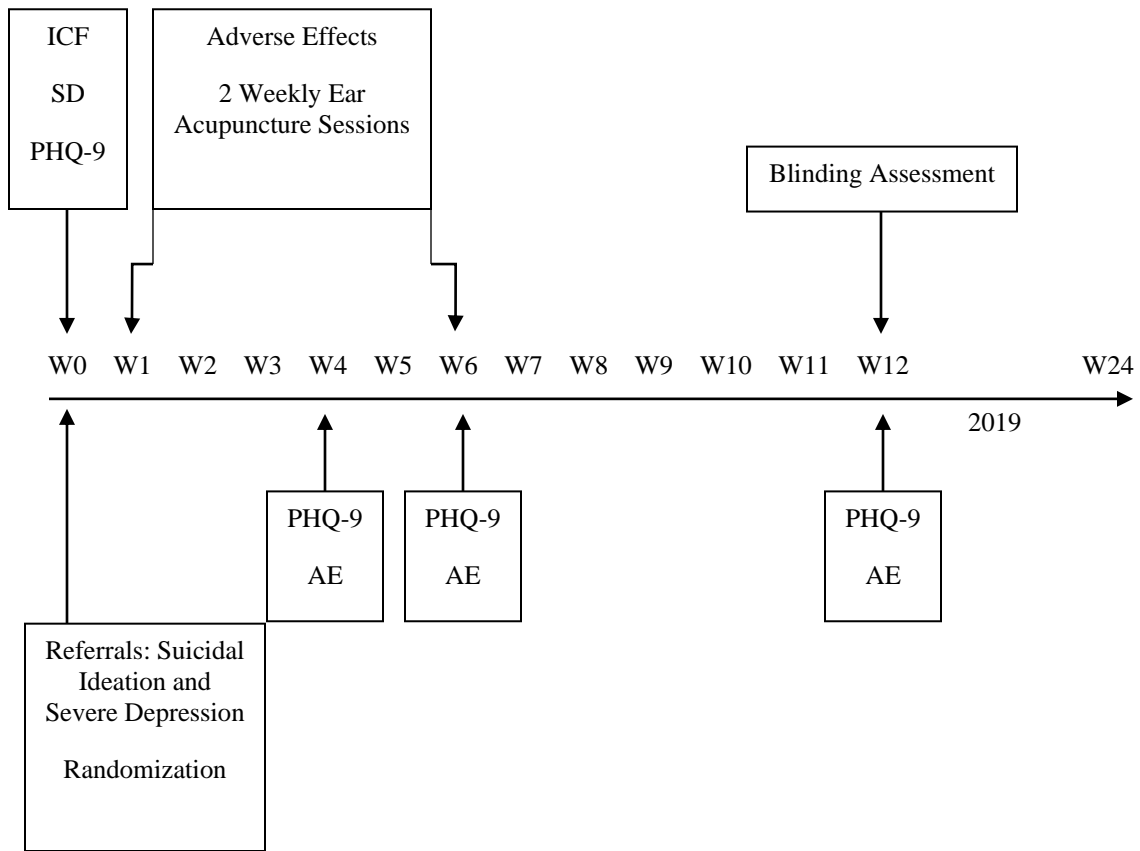

**eFigure 2. Points Applied in the Auricular Pavilion of the Specific Auricular Acupuncture (SA) Group**

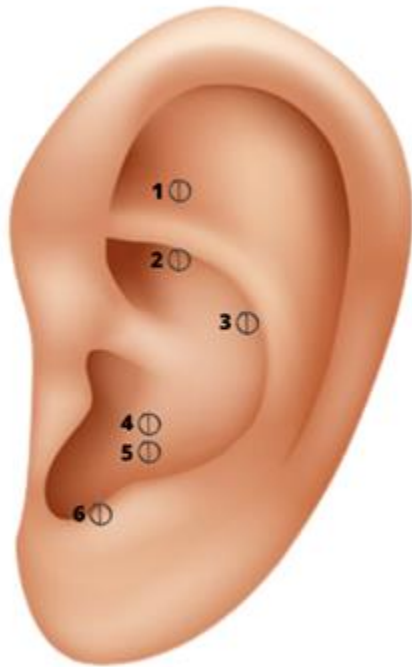

1) Shenmen / TF4 Shenmen

2) Kidney / CO10 Shen

3) Liver / CO12 Gan

4) Heart / CO15 Xin

5) Lung / CO14 Fei

6) Subcortex / AT4 Pizhixia

**eTable 2. Universal Nomenclature, Location, and Indications of the Points Used in the Groups**

| Group                        | Ear Acupuncture Point / Universal and Chinese Nomenclature                                        | Anatomical Location                                                                                                          | Indications                                                                                                                  |
|------------------------------|---------------------------------------------------------------------------------------------------|------------------------------------------------------------------------------------------------------------------------------|------------------------------------------------------------------------------------------------------------------------------|
| <b>Specific AA (SA)</b>      | <i>Shenmen / TF4 Shenmen</i>                                                                      | Upper portion of the apex of the triangular fossa, closer to the upper branch of the antihelix.                              | Analgesic and anti-inflammatory action. It is the most crucial anesthesia point on the ear.                                  |
|                              | <i>Subcortex / AT4 Pizhixia</i>                                                                   | Inner and anterior faces of the antitragus                                                                                   | Rebalances nervous, digestive, and cardiovascular functions                                                                  |
|                              | <i>Heart / CO15 Xin</i>                                                                           | In the center of the cavum conchae                                                                                           | Used for cardiac complaints such as angina, cardiac rhythm disorders                                                         |
|                              | <i>Lung / CO14 Fei</i>                                                                            | Above and below the heart point                                                                                              | Assists with respiratory tract diseases, indicated for nicotine dependence and skin conditions.                              |
|                              | <i>Liver / CO12 Gan</i>                                                                           | In the cymba conchae, above the root of the helix, close to the antihelix.                                                   | Used for liver-related issues, intercostal neuralgia, and ocular conditions.                                                 |
|                              | <i>Kidney / CO10 Shen</i>                                                                         | In the cymba conchae, in a groove below the start of the inferior crus.                                                      | Used for issues in the urinary and genital systems. Assists with tinnitus, auditory conditions, and sleep disorders.         |
| <b>Non-specific AA (NSA)</b> | <i>External Ear / LO6 Neier</i>                                                                   | In the depression between the tragus's upper end and the helix's ascending spine.                                            | Used for inflammatory changes in the external ear. It assists with tinnitus, hearing loss, and temporomandibular joint pain. |
|                              | <i>Cheek/Face / LO5 - LO6 Mianjia</i>                                                             | In an oval portion in the region of the 2 <sup>nd</sup> , 3 <sup>rd</sup> , 5 <sup>th</sup> , and 6 <sup>th</sup> quadrants. | Used for myofascial spasms, facial paresis, and trigeminal neuralgia.                                                        |
|                              | 4 Non-specific points in the Helix region / <i>HX9 Lunyi; HX10 Lunar; HX11 Lunsan; HX12 Lunsi</i> | On the margin of the auricle, between the helix tubercle and the apex, and between the tubercle and the lower lobe point.    | Used for thirst control.                                                                                                     |

**eFigure 3. Points Applied in the Auricular Pavilion of the Nonspecific Auricular Acupuncture (NSA) Group**

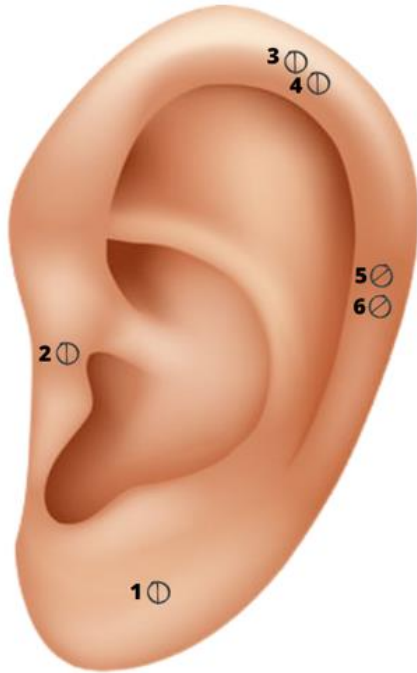

1) Cheek/Face / LO5 - LO6  
Mianjia

2) External Ear / LO6 Neier

3-6) 4 Non-specific points in the  
Helix region / HX9 Lunyi; HX10  
Lunar; HX11 Lunsan; HX12  
Lunsi

**eTable 3. Primary and Secondary Outcomes of the Study**

|                                                                                                                                                                                                                                                |                                                                                                                                                                                                                                                                                                                                                                                                                                                                                                                                                                                                                                                                                                                                                                                                                                                                                                                                                                                                                                                                                                                                            |
|------------------------------------------------------------------------------------------------------------------------------------------------------------------------------------------------------------------------------------------------|--------------------------------------------------------------------------------------------------------------------------------------------------------------------------------------------------------------------------------------------------------------------------------------------------------------------------------------------------------------------------------------------------------------------------------------------------------------------------------------------------------------------------------------------------------------------------------------------------------------------------------------------------------------------------------------------------------------------------------------------------------------------------------------------------------------------------------------------------------------------------------------------------------------------------------------------------------------------------------------------------------------------------------------------------------------------------------------------------------------------------------------------|
| <b>PRIMARY OUTCOME</b>                                                                                                                                                                                                                         | The primary outcome was the difference in the proportion of participants who showed an improvement of 50% or more in depressive symptoms between the groups, as assessed by the PHQ-9 three months after inclusion. A follow-up score after 3 months showed a 50% improvement compared to baseline value was considered as a success or recovery of symptoms.                                                                                                                                                                                                                                                                                                                                                                                                                                                                                                                                                                                                                                                                                                                                                                              |
| <b>SECONDARY OUTCOMES</b><br>The secondary outcomes of the study were included to enrich the understanding of the primary outcome and to evaluate different aspects related to depressive symptoms and the auricular acupuncture intervention. | <ul style="list-style-type: none"><li>• Difference in the proportion of participants who showed an improvement of 50% or more in depressive symptoms between the groups, as assessed by the PHQ-9, at assessments conducted after four and six weeks of study inclusion.</li><li>• Difference in the proportion of participants who achieved a score lower than 5 on the PHQ-9, indicating symptom remission between the groups, as assessed at assessments conducted after four, six weeks, and three months of study inclusion.</li><li>• Differences in depression scores assessed by the PHQ-9 at baseline, the end of the fourth and sixth weeks of auricular acupuncture application, and also three months after inclusion between the groups.</li><li>• Difference in the proportion of adverse events reported by participants through the PHQ-9 after four, six weeks, and three months of study inclusion.</li><li>• Difference in the proportion of adverse effects of auricular acupuncture throughout the sessions between the groups.</li><li>• Evaluation of blinding and perceived efficacy between the groups.</li></ul> |

**eTable 4. Loss to Follow-Up Throughout the Study**

| Attrition Time          | Specific Auricular Acupuncture (SA)<br>(N=37) |             | Non-specific Auricular Acupuncture (NSA)<br>(N=37) |             | p-value <sup>a</sup> |
|-------------------------|-----------------------------------------------|-------------|----------------------------------------------------|-------------|----------------------|
| <b>4 Weeks – N (%)</b>  | 09                                            | 24.3        | 08                                                 | 21.6        | >0.99                |
| <b>6 Weeks – N (%)</b>  | 02                                            | 5.4         | 03                                                 | 8.1         | >0.99                |
| <b>3 Months – N (%)</b> | 02                                            | 5.4         | 03                                                 | 8.1         | >0.99                |
| <b>Total</b>            | <b>13</b>                                     | <b>35.1</b> | <b>14</b>                                          | <b>37.8</b> | >0.99                |

<sup>a</sup> Statistical significance was calculated with Fisher exact test.

**eTable 5. Baseline Depression Score Analysis for Participants Who Did Not Complete the Study**

| VARIABLES                           | Specific Auricular Acupuncture (SA)<br>(N=37) | Non-specific Auricular Acupuncture (NSA)<br>(N=37) | p-value <sup>a</sup> |
|-------------------------------------|-----------------------------------------------|----------------------------------------------------|----------------------|
| <b>Depression Score at baseline</b> |                                               |                                                    |                      |
| Median (Q1 - Q3)                    | 14.0 (12.0 - 16.0)                            | 17.0 (15.0 - 18.0)                                 | 0.06                 |

**eTable 6. Secondary Outcomes of Depression Scores by Intention-to-Treat Analysis**

| VARIABLES                                                | Specific Auricular Acupuncture (SA) | Non-specific Auricular Acupuncture (NSA) | p-value <sup>a</sup> |
|----------------------------------------------------------|-------------------------------------|------------------------------------------|----------------------|
| <b>Depression Score at baseline (N = 74)</b>             |                                     |                                          |                      |
| Median (Q1 - Q3)                                         | 14.0 (12.0 - 16.0)                  | 16.0 (14.0 - 18.0)                       | 0.03                 |
| <b>Depression Score 4 weeks after baseline (N = 57)</b>  |                                     |                                          |                      |
| Median (Q1 - Q3)                                         | 7.5 (4.0 - 11.0)                    | 10.0 (6.0 - 13.0)                        | 0.18                 |
| <b>Depression Score 6 weeks after baseline (N = 51)</b>  |                                     |                                          |                      |
| Median (Q1 - Q3)                                         | 9.0 (4.3 - 13.0)                    | 9.0 (6.0 - 16.0)                         | 0.51                 |
| <b>Depression Score 3 months after baseline (N = 47)</b> |                                     |                                          |                      |
| Median (Q1 - Q3)                                         | 5.5 (3.8 - 11.0)                    | 9.0 (6.5 - 14.0)                         | 0.09                 |

<sup>a</sup> Wilcoxon-Mann-Whitney Unpaired Test  
Legend: Q1: first quartile; Q3: third quartile



**eTable 7. Secondary Efficacy Outcomes in Depression Recovery and Remission by Modified Intent-to-Treat Analysis**

| VARIABLES                                                         | Specific Auricular Acupuncture (SA) (N=24) | p-value <sup>b</sup> | Non-specific Auricular Acupuncture (NSA) (N=23) | p-value <sup>b</sup> | p-value <sup>a</sup> |
|-------------------------------------------------------------------|--------------------------------------------|----------------------|-------------------------------------------------|----------------------|----------------------|
| <b>Depression recovery at 4 weeks compared to baseline, n(%)</b>  |                                            |                      |                                                 |                      |                      |
| Yes                                                               | 10 (42)                                    |                      | 6 (27)                                          |                      | 0.36                 |
| <b>Depression recovery at 6 weeks compared to baseline. n(%)</b>  |                                            |                      |                                                 |                      |                      |
| Yes                                                               | 9 (37)                                     | 0.12                 | 9 (41)                                          | 0.28                 | >0.99                |
| <b>Depression recovery at 3 months compared to baseline. n(%)</b> |                                            |                      |                                                 |                      |                      |
| Yes                                                               | 14 (58)                                    |                      | 9 (41)                                          |                      | 0.38                 |
| <b>Symptom remission at 4 weeks compared to baseline. n(%)</b>    |                                            |                      |                                                 |                      |                      |
| Yes                                                               | 6 (25)                                     |                      | 4 (18)                                          |                      | 0.72                 |
| <b>Symptom remission at 6 weeks compared to baseline. n(%)</b>    |                                            |                      |                                                 |                      |                      |
| Yes                                                               | 6 (25)                                     | 0.06                 | 5 (23)                                          | 0.54                 | >0.99                |
| <b>Symptom remission at 3 months compared to baseline. n(%)</b>   |                                            |                      |                                                 |                      |                      |
| Yes                                                               | <b>11 (46)</b>                             |                      | <b>3 (14)</b>                                   |                      | <b>0.03</b>          |

<sup>a</sup> Fisher's Exact Test

<sup>b</sup> Cochran's Q Test

**eTable 8. Secondary Outcomes of Depression Scores by Modified Intent-to-Treat Analysis**

| VARIABLES                                       | Specific Auricular Acupuncture (SA) (N=24) | p-value <sup>b</sup> | Non-specific Auricular Acupuncture (NSA) (N=23) | p-value <sup>b</sup> | p-value <sup>a</sup> |
|-------------------------------------------------|--------------------------------------------|----------------------|-------------------------------------------------|----------------------|----------------------|
| <b>Depression Score at baseline</b>             |                                            |                      |                                                 |                      |                      |
| Median (Q1 - Q3)                                | 14.0 (12.0 - 17.0)                         |                      | 15.0 (13.2 - 17.0)                              |                      | 0.20                 |
| <b>Depression Score 4 weeks after baseline</b>  |                                            |                      |                                                 |                      |                      |
| Median (Q1 - Q3)                                | 7.5 (4.8 - 11.0)                           | <b>&lt;0.001</b>     | 10.0 (7.0 - 12.8)                               | <b>&lt;0.001</b>     | 0.20                 |
| <b>Depression Score 6 weeks after baseline</b>  |                                            |                      |                                                 |                      |                      |
| Median (Q1 - Q3)                                | 9.0 (4.8 - 13.0)                           | <b>&lt;0.001</b>     | 9.0 (6.3 - 15.2)                                | <b>0.001</b>         | 0.70                 |
| <b>Depression Score 3 months after baseline</b> |                                            |                      |                                                 |                      |                      |
| Median (Q1 - Q3)                                | 5.5 (3.8 - 11.0)                           | <b>&lt;0.001</b>     | 9.0 (6.3 - 14.5)                                | <b>&lt;0.001</b>     | 0.08                 |

<sup>a</sup> Wilcoxon-Mann-Whitney Unpaired

<sup>b</sup> Test Friedman's ANOVA followed by post-hoc test

Legend: Q1: first quartile; Q3: third quartile

**eFigure 4. Median Depression Scores by Modified Intent-to-Treat Analysis**

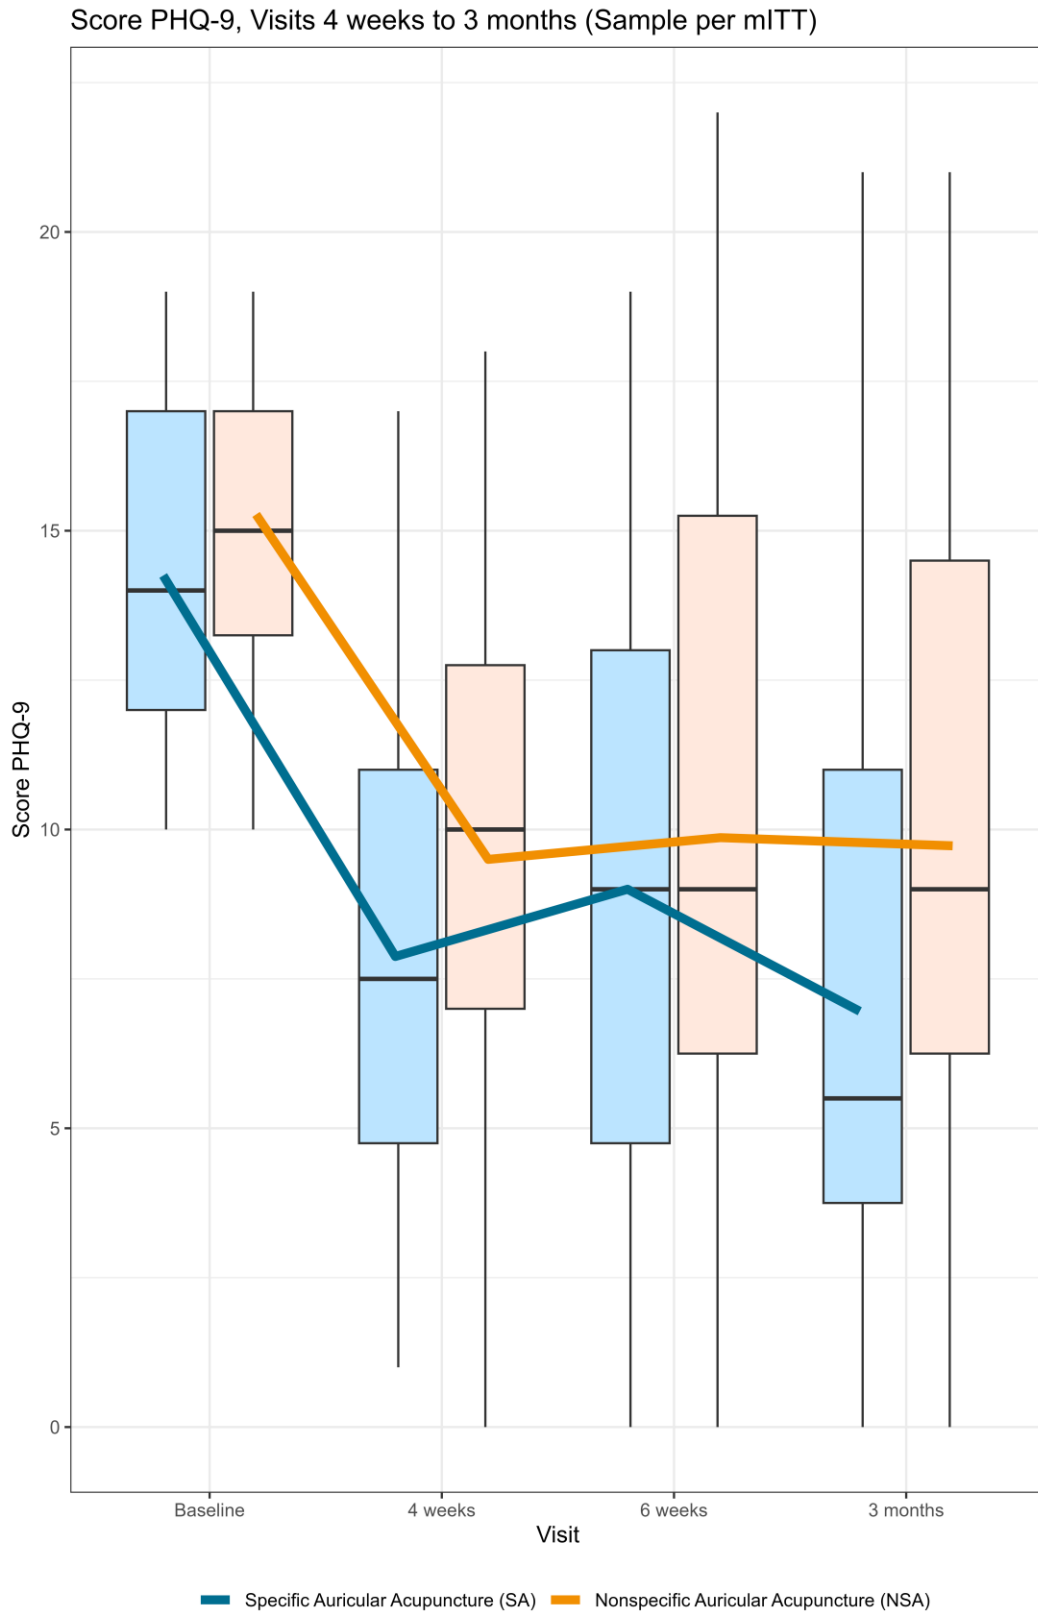

**eTable 9. Sensitivity Analysis for Depression Recovery With Missing Data Imputation**

| Depression Recovery                     | Specific Auricular Acupuncture (SA)<br>(N=37) | Non-specific Auricular Acupuncture (NSA)<br>(N=37) | p-value <sup>a</sup> |
|-----------------------------------------|-----------------------------------------------|----------------------------------------------------|----------------------|
| <b>Last Observation Carried Forward</b> |                                               |                                                    |                      |
| 4 weeks                                 | 12 (32)                                       | 9 (24)                                             | 0.60                 |
| 6 weeks                                 | 10 (27)                                       | 12 (32)                                            | 0.80                 |
| 3 months                                | 15 (40)                                       | 12 (32)                                            | 0.63                 |
| <b>Generalized Estimating Equations</b> |                                               |                                                    |                      |
| 4 weeks                                 | 17 (46)                                       | 10 (27)                                            | 0.15                 |
| 6 weeks                                 | 12 (32)                                       | 10 (27)                                            | 0.80                 |
| 3 months                                | 19 (51)                                       | 12 (32)                                            | 0.16                 |
| <b>Expectation-Maximization Lag</b>     |                                               |                                                    |                      |
| 4 weeks                                 | 12 (32)                                       | 10 (27)                                            | 0.80                 |
| 6 weeks                                 | 16 (43)                                       | 15 (40)                                            | >0.99                |
| 3 months                                | 18 (49)                                       | 15 (40)                                            | 0.64                 |

<sup>a</sup> Fisher's Exact Test

**eTable 10. Sensitivity Analysis for Symptom Remission With Missing Data Imputation**

| Symptom remission                       | Specific Auricular Acupuncture (SA)<br>(N=37) | Non-specific Auricular Acupuncture (NSA)<br>(N=37) | p-value <sup>a</sup> |
|-----------------------------------------|-----------------------------------------------|----------------------------------------------------|----------------------|
| <b>Last Observation Carried Forward</b> |                                               |                                                    |                      |
| 4 weeks                                 | 8 (22)                                        | 5 (13)                                             | 0.54                 |
| 6 weeks                                 | 7 (19)                                        | 6 (16)                                             | >0.99                |
| 3 months                                | <b>12 (32)</b>                                | <b>4 (10)</b>                                      | <b>0.04</b>          |
| <b>Generalized Estimating Equations</b> |                                               |                                                    |                      |
| 4 weeks                                 | 8 (22)                                        | 5 (13)                                             | 0.54                 |
| 6 weeks                                 | 7 (19)                                        | 5 (13)                                             | 0.75                 |
| 3 months                                | <b>11 (30)</b>                                | <b>3 (8)</b>                                       | <b>0.03</b>          |
| <b>Expectation-Maximization Lag</b>     |                                               |                                                    |                      |
| 4 weeks                                 | 8 (22)                                        | 6 (16)                                             | 0.76                 |
| 6 weeks                                 | 9 (24)                                        | 7 (19)                                             | 0.77                 |
| 3 months                                | <b>13 (35)</b>                                | <b>5 (13)</b>                                      | <b>0.05</b>          |

<sup>a</sup> Fisher's Exact Test

**Table 11. Sensitivity Analysis for Depression Score with Missing Data Imputation**

| Depression Score - Median (Q1 - Q3)     | Specific Auricular Acupuncture (SA) (N=37) | Non-specific Auricular Acupuncture (NSA) (N=37) | p-value <sup>a</sup> |
|-----------------------------------------|--------------------------------------------|-------------------------------------------------|----------------------|
| <b>Generalized Estimating Equations</b> |                                            |                                                 |                      |
| Baseline                                | <b>14.0 (12.0 - 16.0)</b>                  | <b>16.0 (14.0 - 18.0)</b>                       | <b>0.02</b>          |
| 4 weeks                                 | <b>7.9 (5.0 - 10.0)</b>                    | <b>9.5 (7.0 - 12.0)</b>                         | <b>0.04</b>          |
| 6 weeks                                 | 8.7 (6.0 - 10.0)                           | 10.2 (8.0 - 10.2)                               | 0.09                 |
| 3 months                                | <b>7.5 (4.0 - 8.0)</b>                     | <b>9.1 (8.0 - 10.0)</b>                         | <b>0.01</b>          |

<sup>a</sup> Wilcoxon-Mann-Whitney Unpaired Test  
 Legend: Q1: first quartile; Q3: third quartile

**eTable 12. Adjustment of the Generalized Estimating Equations (GEE) Model**

| Variable                                 | Estimative | Standard Error | Wald Est | p-value |
|------------------------------------------|------------|----------------|----------|---------|
| Intercept                                | 13.98      | 0.514          | 740.50   | <0.001  |
| Non-specific Auricular Acupuncture (NSA) | 1.57       | 0.682          | 5.30     | 0.02    |
| 4 weeks                                  | -6.08      | 0.753          | 65.30    | <0.001  |
| 6 weeks                                  | -5.32      | 0.904          | 34.70    | <0.001  |
| 3 months                                 | -6.45      | 0.873          | 54.70    | <0.001  |

Follow-up at four time points (baseline, 4 weeks, 6 weeks, and 3 months)

Response variable: depression score (quantitative)

Time variable: visit (baseline, 4 weeks, 6 weeks, and 3 months)

Covariate: group (Specific Auricular Acupuncture (SA), Non-Specific Auricular Acupuncture (NSA) and visit.

**eTable 13: Blinding Assessment and Perception of Treatment Efficacy**

| VARIABLES                                       | Specific Auricular Acupuncture (SA) | Auricular Acupuncture (AA) | Non-specific Auricular Acupuncture (NSA) |    | p-value <sup>a</sup> |
|-------------------------------------------------|-------------------------------------|----------------------------|------------------------------------------|----|----------------------|
| <b>Perception of Allocation Group – N (%)</b>   |                                     |                            |                                          |    |                      |
| Specific Auricular Acupuncture                  | 14                                  | 58                         | 14                                       | 61 | 0.29                 |
| Non-specific Auricular Acupuncture              | 6                                   | 25                         | 2                                        | 9  |                      |
| Not sure                                        | 4                                   | 17                         | 7                                        | 30 |                      |
| <b>Perception of Efficacy in Symptom Relief</b> |                                     |                            |                                          |    |                      |
| Yes (treatment was effective)                   | 13                                  | 54                         | 12                                       | 52 | 0.73                 |
| No (treatment was not effective)                | 5                                   | 21                         | 3                                        | 13 |                      |
| Not sure                                        | 6                                   | 25                         | 8                                        | 35 |                      |

<sup>a</sup> Statistical significance was calculated with Fisher's exact test.
