# Supplementary material for: Efficacy and Safety of Auricular Acupuncture for Depression: A Randomized Clinical Trial
Source: PubMed Central journal article supplement (PMC10690462; doi:10.1001/jamanetworkopen.2023.45138), 2023-11-30
Supplement: jamanetwopen-e2345138-s003.pdf [file jamanetwopen-e2345138-s003.pdf]

## Data Sharing Statement

de Oliveira Rodrigues. Efficacy and Safety of Auricular Acupuncture for Depression. *JAMA Netw Open*. Published November 30, 2023. doi:10.1001/jamanetworkopen.2023.45138

### Data

**Data available:** Yes

**Data types:** Deidentified participant data

**How to access data:** [faisal@usp.br](mailto:faisal@usp.br)

**When available:** With publication

### Supporting Documents

**Document types:** Statistical/analytic code, Informed consent form

**How to access documents:** [faisal@usp.br](mailto:faisal@usp.br)

**When available:** With publication

### Additional Information

**Who can access the data:** Anyone requesting the data

**Types of analyses:** For a specified purpose

**Mechanisms of data availability:** With investigator support

**Any additional restrictions:** None
